# Supplementary material
Source: ML conference proceedings conference paper supplement (https://proceedings.neurips.cc/paper_files/paper/2012/hash/0f304eddb4ad6007a3093fd6d963a1d2-Abstract.html)
Supplement: Supplementary file 1 [file 0f304eddb4ad6007a3093fd6d963a1d2-Supplemental.zip]

# Supplementary material for “Proximal Newton-type methods for convex optimization”

Jason D. Lee<sup>†</sup> and Yuekai Sun<sup>\*</sup>

Institute for Computational and Mathematical Engineering  
Stanford University, Stanford, CA  
{jdl17, yuekai}@stanford.edu

Michael A. Saunders

Department of Management Science and Engineering  
Stanford University, Stanford, CA  
saunders@stanford.edu

November 9, 2012

## A Proofs

### A.1 Proof of Lemma 2.2

*Proof.*  $h$  is convex so for  $t \in (0, 1]$ , we have

$$\begin{aligned} f(x^+) - f(x) &= g(x^+) - g(x) + h(x^+) - h(x) \\ &\leq g(x^+) - g(x) + th(x + \Delta x) + (1 - t)h(x) - h(x) \\ &= g(x^+) - g(x) + t(h(x + \Delta x) - h(x)) \\ &= \nabla g(x)^T (t\Delta x) + t(h(x + \Delta x) - h(x)) + O(t^2), \end{aligned}$$

which proves (8).

$\Delta x$  steps to the minimizer of  $h$  plus our quadratic approximation to  $g$  so  $t\Delta x$  satisfies

$$\begin{aligned} &\nabla g(x)^T \Delta x + \frac{1}{2} \Delta x^T H \Delta x + h(x + \Delta x) \\ &\leq \nabla g(x)^T (t\Delta x) + \frac{t^2}{2} \Delta x^T H \Delta x + h(x^+) \\ &\leq t\nabla g(x)^T \Delta x + \frac{t^2}{2} \Delta x^T H \Delta x + th(x + \Delta x) + (1 - t)h(x). \end{aligned}$$

We can rearrange and then simplify to obtain

$$\begin{aligned} (1 - t)\nabla g(x)^T \Delta x + \frac{1}{2}(1 - t^2)\Delta x^T H \Delta x + (1 - t)(h(x + \Delta x) - h(x)) &\leq 0 \\ \nabla g(x)^T \Delta x + \frac{1}{2}(1 + t)\Delta x^T H \Delta x + h(x + \Delta x) - h(x) &\leq 0 \\ \nabla g(x)^T \Delta x + h(x + \Delta x) - h(x) &\leq \frac{1}{2}(1 + t)\Delta x^T H \Delta x. \end{aligned}$$

Finally, we let  $t \rightarrow 1$  and rearrange to obtain (9). □

---

<sup>\*</sup>Equal contributors

<sup>†</sup>Equal contributors

## A.2 Proof of Lemma 2.3

*Proof.* We can bound the decrease at each iteration by

$$\begin{aligned}
f(x^+) - f(x) &= g(x^+) - g(x) + h(x^+) - h(x) \\
&\leq \int_0^1 \nabla g(x + s(t\Delta x))^T (t\Delta x) ds + th(x + \Delta x) + (1-t)h(x) - h(x) \\
&= \nabla g(x)^T (t\Delta x) + t(h(x + \Delta x) - h(x)) \\
&\quad + \int_0^1 (\nabla g(x + s(t\Delta x)) - \nabla g(x))^T (t\Delta x) ds \\
&\leq t(\nabla g(x)^T (t\Delta x) + h(x + \Delta x) - h(x)) \\
&\quad + \int_0^1 \|\nabla g(x + s(\Delta x)) - \nabla g(x)\| \|\Delta x\| ds.
\end{aligned}$$

$\nabla g$  is Lipschitz continuous so

$$\begin{aligned}
f(x^+) - f(x) &\leq t \left( \nabla g(x)^T \Delta x + h(x + \Delta x) - h(x) + \frac{L_1 t^2}{2} \|\Delta x\|^2 \right) \\
&= t \left( \Delta + \frac{L_1 t}{2} \|\Delta x\|^2 \right).
\end{aligned} \tag{18}$$

If we choose  $t \leq \frac{2m}{L_1}(1 - \alpha)$ , then

$$\frac{L_1 t}{2} \|\Delta x\|^2 \leq m(1 - \alpha) \|\Delta x\|^2 \leq (1 - \alpha) \Delta x^T H \Delta x \leq -(1 - \alpha) \Delta. \tag{19}$$

We can substitute (19) into (18) to obtain

$$f(x^+) - f(x) \leq t(\Delta - (1 - \alpha)\Delta) = t(\alpha\Delta).$$

□

## A.3 Proof of Theorem 3.2

*Proof.*  $\{f(x_k)\}$  is a nonincreasing sequence because  $\Delta x$  is a descent direction, and there exist step lengths that satisfy (10) (Lemma 2.3).  $f$  is also bounded below so  $\{f(x_k)\}$  must converge; *i.e.*

$$f(x_k) - f(x_{k+1}) = \alpha t_k \Delta_k \rightarrow 0.$$

The step lengths  $t_k$  are bounded away from zero because sufficiently small step lengths satisfy the sufficient descent condition so  $\Delta_k$  must decay to zero.  $\Delta_k$  satisfies

$$\begin{aligned}
\Delta_k &= \nabla g(x_k)^T \Delta x_k + h(x_k + \Delta x_k) - h(x_k) \\
&\leq -\Delta x_k^T H_k \Delta x_k \leq -m \|\Delta x_k\|^2,
\end{aligned}$$

where first inequality follows from (9). We reverse this inequality to obtain

$$\|\Delta x_k\|^2 \leq \frac{1}{m} \Delta x_k^T H_k \Delta x_k \leq -\frac{1}{m} \Delta_k$$

so the search directions  $\Delta x_k$  must also converge to zero. This is sufficient the sequence  $\{x_k\}$  converges to be a minimizer of  $f$  (Lemma 3.1). □

## A.4 Proof of Lemma 3.4

*Proof.*  $h$  is convex, so  $\partial h$  is monotone.  $H$  is a symmetric, positive definite matrix so we have

$$\begin{aligned}
(\partial h(x) - \partial h(y))^T (x - y) &\geq 0 \\
(x - y)^T H (x - y) &\geq m \|x - y\|^2.
\end{aligned}$$

We add the two equations above and divide by  $m$  to obtain

$$\begin{aligned} \frac{1}{m}(Hx + \partial h(x) - Hy + \partial h(y))^T(x - y) &\geq \|x - y\|^2 \\ \left( \left[ \frac{1}{m}(H + \partial h) \right] (x) - \left[ \frac{1}{m}(H + \partial h) \right] (y) \right)^T (x - y) &\geq \|x - y\|^2. \end{aligned}$$

Let  $u$  and  $v$  denote  $\left[ \frac{1}{m}(H + \partial h) \right] (x)$  and  $\left[ \frac{1}{m}(H + \partial h) \right] (y)$  respectively. Then, after simplifying,

$$(u - v)^T(R(u) - R(v)) \geq \|R(u) - R(v)\|^2.$$

□

### A.5 Proof of Theorem 3.5

*Proof.* The assumptions of Lemma 3.3 are satisfied so step lengths of unity satisfy the sufficient descent condition after sufficiently many iterations. Hence, for  $k$  sufficiently large, we have

$$x_{k+1} = \text{prox}_h^{H_k}(x_k - H_k^{-1}\nabla g(x_k)).$$

Let  $\nabla S_k(x)$  denote  $\left[ \frac{1}{m}(H_k - \nabla^2 g(x)) \right]$ .  $R$  is nonexpansive (Lemma 3.4) so

$$\begin{aligned} \|x_{k+1} - x^*\| &\leq \|R_k \circ S_k(x_k) - R_k \circ S_k(x^*)\| \\ &\leq \|S_k(x_k) - S_k(x^*)\| \\ &\leq \|S_k(x_k) - S_k(x^*) - \nabla S_k(x^*)(x_k - x^*)\| \\ &\quad + \|\nabla S_k(x^*)(x_k - x^*)\|. \end{aligned} \tag{20}$$

We choose  $H_k = \nabla^2 g(x_k)$  and  $\nabla^2 g$  is Lipschitz continuous; hence

$$\begin{aligned} \|\nabla S_k(x^*)(x_k - x^*)\| &\leq \frac{1}{m} \|\nabla^2 g(x_k) - \nabla^2 g(x^*)\| \|x_k - x^*\| \\ &\leq \frac{L_2}{m} \|x_k - x^*\|^2. \end{aligned} \tag{21}$$

$\{x_k\} \rightarrow x^*$  and  $\nabla g$  is continuous, so for  $k$  sufficiently large,

$$\begin{aligned} &\|S_k(x_k) - S_k(x^*) - \nabla S_k(x^*)(x_k - x^*)\| \\ &= \left\| \int_0^1 (\nabla S_k(x^* + t(x_k - x^*)) - \nabla S_k(x^*)) (x_k - x^*) dt \right\| \\ &\leq \int_0^1 \|(\nabla S_k(x^* + t(x_k - x^*)) - \nabla S_k(x^*))\| \|x_k - x^*\| dt \\ &\leq \int_0^1 \frac{1}{m} \|\nabla^2 g(x^*) - \nabla^2 g(x^* + t(x_k - x^*))\| \|x_k - x^*\| dt \\ &\leq \int_0^1 \frac{L_2}{m} t \|x_k - x^*\|^2 dt \leq \frac{L_2}{2m} \|x_k - x^*\|^2. \end{aligned} \tag{22}$$

Substituting (21) and (22) into (20), we have

$$\|x_{k+1} - x^*\| \leq \frac{3L_2}{2m} \|x_k - x^*\|^2.$$

□

### A.6 Proof of Lemma 3.6

*Proof.* The Lipschitz continuity of  $\nabla^2 g$  imposes a cubic upper bound on  $g$ :

$$g(x + t\Delta x) \leq g(x) + t\nabla g(x)^T \Delta x + \frac{1}{2} t^2 \Delta x^T \nabla^2 g(x) \Delta x + \frac{1}{6} L_2 t^3 \|\Delta x\|^3.$$

We set  $t = 1$  and add  $h(x + \Delta x)$  to both sides to obtain

$$\begin{aligned} f(x + \Delta x) &\leq g(x) + \nabla g(x)^T \Delta x + \frac{1}{2} \Delta x^T \nabla^2 g(x) \Delta x \\ &\quad + \frac{1}{6} L_2 \|\Delta x\|^3 + h(x + \Delta x). \end{aligned}$$

We then add and subtract  $h(x)$  and  $\frac{1}{2} \Delta x^T H \Delta x$  from the right hand side and simplify to obtain

$$\begin{aligned} f(x + \Delta x) &\leq f(x) + \Delta + \frac{1}{2} \Delta x^T (\nabla^2 g(x) - H) \Delta x \\ &\quad + \frac{1}{2} \Delta x^T H \Delta x + \frac{1}{6} L_2 \|\Delta x\|^3. \end{aligned} \tag{23}$$

$\frac{1}{2} \Delta x^T (\nabla^2 g(x) - H) \Delta x$  can be split into two terms that can be bounded using the Lipschitz continuity of  $\nabla^2 g$  and the Dennis-Moré criterion:

$$\begin{aligned} &\frac{1}{2} \Delta x^T (\nabla^2 g(x) - H) \Delta x \\ &= \frac{1}{2} \Delta x^T (\nabla^2 g(x) - \nabla^2 g(x^*)) \Delta x + \frac{1}{2} \Delta x^T (\nabla^2 g(x^*) - H) \Delta x \\ &\leq L_2 \|x - x^*\| \|\Delta x\|^2 + \frac{1}{2} \|\Delta x\| \|(\nabla^2 g(x^*) - H) \Delta x\| \\ &= o(\|\Delta x\|^2) + o(\|\Delta x\|^2). \end{aligned}$$

$\Delta x^T H \Delta x$  can also be bounded using  $\Delta x^T H \Delta x \leq -\Delta$ . We substitute these expressions into (23) and rearrange to obtain

$$\begin{aligned} f(x + \Delta x) - f(x) &\leq \Delta - \frac{1}{2} \Delta + \frac{1}{2} \Delta x^T (\nabla^2 g(x) - H) \Delta x + \frac{1}{6} L_2 \|\Delta x\|^2 \|\Delta x\| \\ &\leq \frac{1}{2} \Delta + \frac{1}{6} L_2 \|\Delta x\|^2 \Delta + o(\|\Delta x\|^2). \end{aligned}$$

$\{\Delta x_k\} \rightarrow 0$  (see the proof of Theorem 3.2) so  $f(x_k + \Delta x_k) - f(x_k) \leq \frac{1}{2} \Delta_k$  after sufficiently many iterations and thus the unit step length shall eventually satisfy the sufficient descent condition.  $\square$

## A.7 Proof of Lemma 3.7

*Proof.*  $\Delta x$  and  $\Delta \hat{x}$  are the solutions to their respective subproblems so they are also the solutions to

$$\begin{aligned} \Delta x &= \arg \min_d \nabla g(x)^T d + \Delta x^T H d + h(x + d), \\ \Delta \hat{x} &= \arg \min_d \nabla g(x)^T d + \Delta \hat{x}^T \hat{H} d + h(x + d). \end{aligned}$$

Hence  $\Delta x$  and  $\Delta \hat{x}$  satisfy

$$\begin{aligned} &\nabla g(x)^T \Delta x + \Delta x^T H \Delta x + h(x + \Delta x) \\ &\leq \nabla g(x)^T \Delta \hat{x} + \Delta \hat{x}^T H \Delta \hat{x} + h(x + \Delta \hat{x}) \end{aligned}$$

and

$$\begin{aligned} &\nabla g(x)^T \Delta \hat{x} + \Delta \hat{x}^T \hat{H} \Delta \hat{x} + h(x + \Delta \hat{x}) \\ &\leq \nabla g(x)^T \Delta x + \Delta x^T \hat{H} \Delta x + h(x + \Delta x). \end{aligned}$$

We sum these two inequalities and rearrange to obtain

$$\Delta x^T H \Delta x - \Delta x^T (H + \hat{H}) \Delta \hat{x} + \Delta \hat{x}^T \hat{H} \Delta \hat{x} \leq 0.$$

We can complete the square on the left hand side and rearrange to obtain

$$\begin{aligned} &\Delta x^T H \Delta x - 2 \Delta x^T H \Delta \hat{x} + \Delta \hat{x}^T H \Delta \hat{x} \\ &\leq \Delta x^T (\hat{H} - H) \Delta \hat{x} + \Delta \hat{x}^T (H - \hat{H}) \Delta \hat{x}. \end{aligned}$$

The left hand side is  $\|\Delta x - \Delta \hat{x}\|_H^2$  and the eigenvalues of  $H$  are bounded so

$$\begin{aligned}\|\Delta x - \Delta \hat{x}\| &\leq \frac{1}{\sqrt{m}} \left( \Delta x^T (\hat{H} - H) \Delta x + \Delta \hat{x}^T (H - \hat{H}) \Delta \hat{x} \right)^{1/2} \\ &\leq \frac{1}{\sqrt{m}} \left\| (\hat{H} - H) \Delta \hat{x} \right\|^{1/2} (\|\Delta x\| + \|\Delta \hat{x}\|)^{1/2}.\end{aligned}\quad (24)$$

We use a result due to Tseng and Yun (Lemma 3 in [21]) to bound  $(\|\Delta x\| + \|\Delta \hat{x}\|)$ . Let  $P = \hat{H}^{-1/2} H \hat{H}^{-1/2}$ , then  $\|\Delta x\|$  and  $\|\Delta \hat{x}\|$  satisfy

$$\|\Delta x\| \leq \left( \frac{\hat{M} \left( 1 + \lambda_{\max}(P) + \sqrt{1 - 2\lambda_{\min}(P) + \lambda_{\max}(P)^2} \right)}{2m} \right) \|\Delta \hat{x}\|.$$

We denote this constant using  $c$  and conclude that

$$\|\Delta x\| + \|\Delta \hat{x}\| \leq (1 + c) \|\Delta \hat{x}\|. \quad (25)$$

We substitute this inequality into (24) to obtain

$$\|\Delta x - \Delta \hat{x}\|^2 \leq \sqrt{\frac{1+c}{m}} \left\| (\hat{H} - H) \Delta \hat{x} \right\|^{1/2} \|\Delta \hat{x}\|^{1/2}.$$

□

### A.8 Proof of Theorem 3.8

*Proof.* We select unit step lengths after sufficiently many iterations (Lemma 3.6) so for large  $k$ , we have

$$x_{k+1} = \text{prox}_h^{H_k} \left( x_k - \nabla^2 g(x_k)^{-1} \nabla g(x_k) \right).$$

We can split  $\|x_{k+1} - x^*\|$  into two terms:

$$\|x_{k+1} - x^*\| \leq \|x_k + \Delta x_k^{nt} - x^*\| + \|\Delta x_k - \Delta x_k^{nt}\|.$$

The first term decays to zero quadratically because the proximal Newton method converges to  $x^*$  quadratically; *i.e.*

$$\|x_k + \Delta x_k^{nt} - x^*\| = O \left( \|x_k^{nt} - x^*\|^2 \right).$$

The second term  $\|\Delta x_k - \Delta x_k^{nt}\| = O \left( \|(\nabla^2 g(x_k) - H_k) \Delta x_k\|^{1/2} \|\Delta x_k\|^{1/2} \right)$  (Lemma 3.7).

We can show that  $\|(\nabla^2 g(x_k) - H_k) \Delta x_k\| = o(\|\Delta x_k\|)$ :

$$\begin{aligned}\|(\nabla^2 g(x_k) - H_k) \Delta x_k\| &\leq \|(\nabla^2 g(x_k) - \nabla^2 g(x^*)) \Delta x_k\| + \|(\nabla^2 g(x^*) - H_k) \Delta x_k\| \\ &\leq L_2 \|x_k - x^*\| \|\Delta x_k\| + o(\|\Delta x_k\|).\end{aligned}$$

thus  $\|\Delta x_k^{nt}\| = o(\|\Delta x_k\|)$ .

$\|\Delta x_k\|$  is within a factor  $c_k$  of  $\|\Delta x_k^{nt}\|$  (Lemma 3 in [21]) so

$$\begin{aligned}\|\Delta x_k\| &\leq c_k \|\Delta x_k^{nt}\| = c_k \|x_{k+1} - x_k\| \\ &\leq c_k (\|x_{k+1} - x^*\| + \|x^* - x_k\|) \\ &\leq O(\|x_k - x^*\|^2) + O(\|x_k - x^*\|).\end{aligned}$$

The second inequality follows from  $c_k = O(1)$ , due to the bounded eigenvalues of  $H_k$  and  $\nabla^2 g(x_k)$ . Hence  $\|\Delta x_k\| = O(\|x_k - x^*\|)$  and  $\|x_{k+1} - x^*\| \leq o(\|x_k - x^*\|)$ . □
